# Supplementary material for: Identification of an Exopolysaccharide Biosynthesis Gene in Bradyrhizobium diazoefficiens USDA110
Source: MDPI journal article supplement (doi:10.3390/microorganisms9122490), 2021-12-01
Supplement: s1 [file s1]

## Supplementary Information

Identification of an exopolysaccharide biosynthesis gene in *Bradyrhizobium diazoefficiens* USDA110

Chunxia Xu, Huaqin Ruan, Wenjie Cai, Christian Staehelin and Weijun Dai

**Figure S1.** Photograph of ethanol precipitates obtained from culture supernatants of *B. diazoefficiens* USDA110 the *blr2358* mutant and a complementation strain.

**Figure S2.** MALDI-TOF spectrum of oligosaccharides of *B. diazoefficiens* USDA110 derived from the ethanol-precipitated polysaccharide.

**Table S1.** Statistics of whole-genome short read re-sequencing results obtained from Tn5 mutant colonies.

**Table S2.** Predicted and observed mass spectrometry signals obtained from the MALDI-TOF spectrum shown in Figure S2.

**Table S3.** List of glycosyltransferase homologs of *blr2358* in the *Bradyrhizobium* genus. See separate Excel file.

**Table S4.** Oligonucleotides used in this study.

**Table S5.** Bacterial strains and plasmids used in this study.

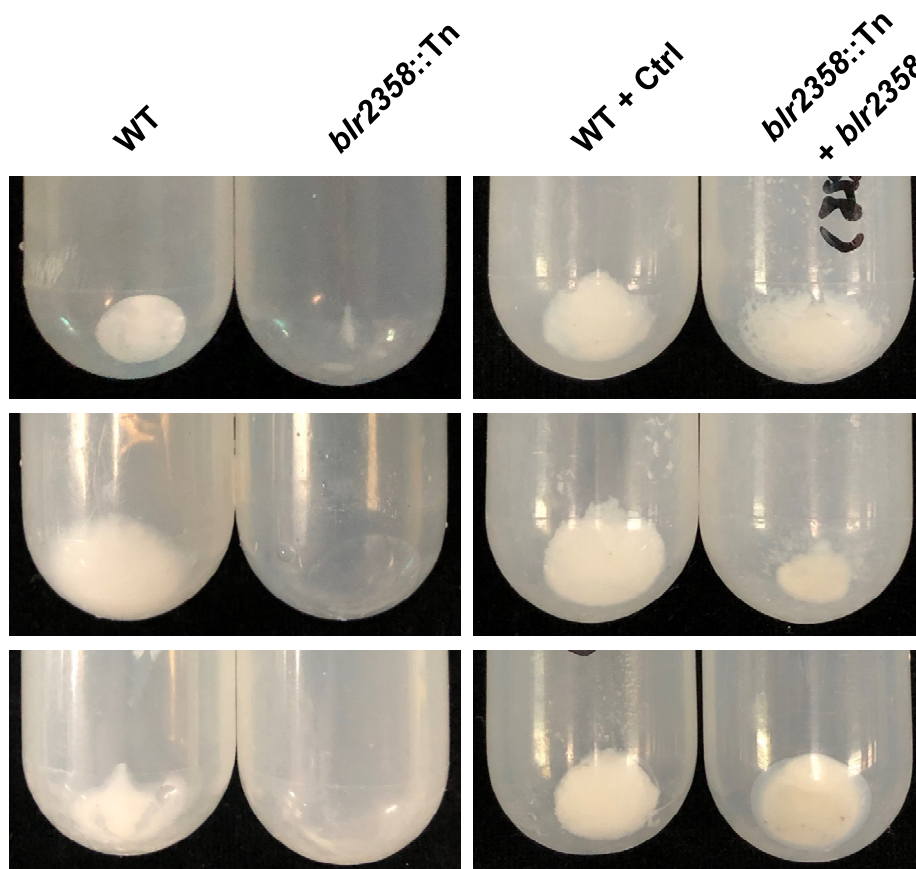

**Figure S1. Photograph of ethanol precipitates obtained from culture supernatants of *B. diazoefficiens* USDA110, the *blr2358* mutant and a complementation strain.** Three biological replicates of each strain were grown in GMS medium and culture supernatants (cell cultures adjusted to  $OD_{600} \approx 1.0$ ) were treated with ethanol at a ratio of 1:5. After overnight incubation at 4°C, precipitated material was obtained by centrifugation. Abbreviations: WT, wild-type *B. diazoefficiens* USDA110; *blr2358::Tn*, mutant with Tn5 insertion in *blr2358*. WT + Ctrl, WT carrying an empty control plasmid; *blr2358::Tn* + *blr2358*, *blr2358::Tn* mutant complemented with a *blr2358* copy.

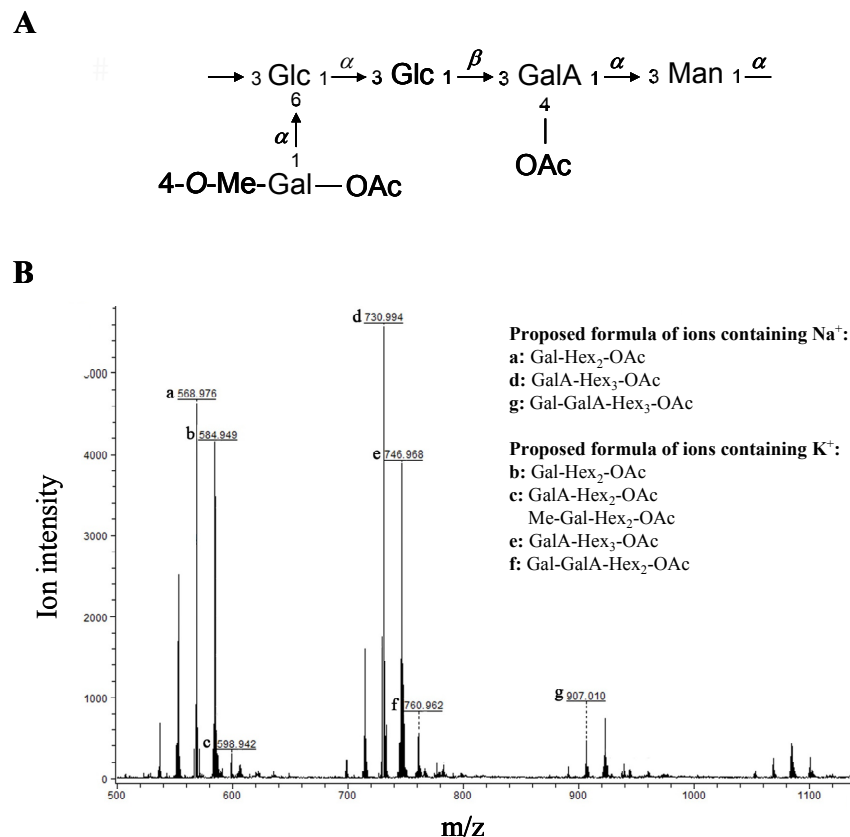

**Figure S2. MALDI-TOF spectrum of oligosaccharides of *B. diazoefficiens* USDA110 derived from the ethanol-precipitated polysaccharide.** The ethanol precipitate was purified by gel filtration, hydrolyzed with TFA and subjected to positive-ion MALDI-TOF mass spectrometry. **(A)** Repeating subunit of the EPS of strain USDA110 as reported by Mort & Bauer (1982). **(B)** Positive-ion MALDI-TOF mass spectrum of obtained oligosaccharides. Two major ion families were observed, corresponding to trisaccharides and tetrasaccharides of EPS. Most ions contained sodium and potassium adducts. Predicted and observed signals are listed in Table S2 along with their proposed formulas.

Mort A. J. & Bauer W. D. Application of two new methods for cleavage of polysaccharides into specific oligosaccharide fragments. Structure of the capsular and extracellular polysaccharides of *Rhizobium japonicum* that bind soybean lectin. Journal of Biological Chemistry 257, 1870-1875 (1982).

**Table S1. Statistics of whole-genome short read re-sequencing results obtained from Tn5 mutant colonies.**

| Colony | No. of total reads | No. of mapped reads | Percentage of mapped reads (%) | Coverage position | Genome coverage (%) | Sequencing depth |
|--------|--------------------|---------------------|--------------------------------|-------------------|---------------------|------------------|
| BJ#25  | 39,732,425         | 39,630,023          | 99.74                          | 8927192           | 98.0                | 557              |
| BJ#47  | 47,978,094         | 47,830,501          | 99.69                          | 8927360           | 98.0                | 671              |
| BJ#57  | 42,575,145         | 42,430,556          | 99.66                          | 8927154           | 98.0                | 589              |
| WT     | 30,686,712         | 30,640,961          | 99.85                          | 8926930           | 98.0                | 433              |

Short reads were mapped to the reference genome of *Bradyrhizobium diazoefficiens* USDA110 (NC\_004463.1).

WT, wild-type USDA110.

**Table S2. Predicted and observed mass spectrometry signals obtained from the MALDI-TOF spectrum shown in Figure S2.**

| Proposed<br>formula <sup>a</sup> | [M-Na] <sup>+1</sup>   |                       | [M-K] <sup>+1</sup> |          |
|----------------------------------|------------------------|-----------------------|---------------------|----------|
|                                  | Predicted <sup>b</sup> | Observed <sup>c</sup> | Predicted           | Observed |
| Me-Gal-Hex2-OAc                  | 583.4746               | NO <sup>d</sup>       | 599.5836            | 598.942  |
| Gal-GalA-Hex3-OAc                | 907.7216               | 907.010               | 923.8306            | NO       |
| Gal-GalA-Hex2-OAc                | 745.5756               | NO                    | 761.6846            | 760.962  |
| Gal-Hex2-OAc                     | 569.4524               | 568.967               | 585.5614            | 584.949  |
| GalA-Hex3-OAc                    | 731.5984               | 730.994               | 747.7074            | 746.968  |
| GalA-Hex2-OAc                    | 583.4296               | NO                    | 599.5386            | 598.942  |

<sup>a</sup> Oligosaccharides corresponding to the published EPS structure containing hexose and galacturonic acid residues partially modified by methyl and O-acetyl groups.

<sup>b</sup> Values calculated from the average incremental masses.

<sup>c</sup> See Figure S2.

<sup>d</sup> NO, not observed.

**Table S3. List of glycosyltransferase homologs of *blr2358* in the *Bradyrhizobium* genus.**

See separate Excel file.

**Table S4. Oligonucleotides used in this study.**

| ID                                                  | Name                | Sequence, 5' to 3'                        |
|-----------------------------------------------------|---------------------|-------------------------------------------|
| <b>Detection of pLG107-Tn5 plasmid insertion</b>    |                     |                                           |
| OCX-1                                               | 2358HF              | GCCTCTTCGCTATTACGCCA                      |
| OCX-2                                               | 2358HR              | AGACGTCATACTCAACCCGC                      |
| <b>Expression of pBBR1MCS5-based <i>blr2358</i></b> |                     |                                           |
| OCX-3                                               | pBBR1MCS5-blr2358_F | CGCTCTAGAACTAGTGGATCCTCAGTAGGCTTCCTGATGAA |
| OCX-4                                               | pBBR1MCS5-blr2358_R | GTCGACGGTATCGATAAGCTTATGGCTGTAGCAACTTACGG |

**Table S5. Bacterial strains and plasmids used in this study.**

| Bacterial strain                            | Description                                                                                    | Reference or source |
|---------------------------------------------|------------------------------------------------------------------------------------------------|---------------------|
| <b><i>Bradyrhizobium diazoefficiens</i></b> |                                                                                                |                     |
| USDA110                                     | Wild-type                                                                                      | Ref. 1              |
| BJ#25                                       | USDA110 Tn5 mutant colony                                                                      | This study          |
| USDA110-Ctrl                                | USDA110 carrying an empty pBBR1MCS5 plasmid                                                    | This study          |
| BJ#25-pBBR1MCS5- <i>blr2358</i>             | BJ#25 carrying the pBBR1MCS5- <i>blr2358</i> construct                                         | This study          |
| <b><i>Escherichia coli</i></b>              |                                                                                                |                     |
| DH5α                                        | <i>fhuA2 Δ(argF-lacZ)U169 phoA glnV44 Φ80 Δ(lacZ)M15 gyrA96 recA1 relA1 endA1 thi-1 hsdR17</i> | Ref. 2              |
| <b>Plasmids</b>                             |                                                                                                |                     |
| pLG107-Tn5                                  | Tn5-based transposon plasmid                                                                   | Ref. 3              |
| pBBR1MCS5                                   | Broad-host-range expression plasmid                                                            | Ref. 4              |

1. Regensburger, B. & Hennecke, H. RNA polymerase from *Rhizobium japonicum*. Archives of Microbiology 135, 103-109 (1983).
2. Hanahan, D. In DNA Cloning: A Practical Approach (Glover, D.M., ed.), Vol. 1, p. 109, IRL Press, McLean, Virginia, USA (1985).
3. Pechter, K. B., Gallagher, L., Pyles, H., Manoil, C. S. & Harwood, C. S. Essential genome of the metabolically versatile alphaproteobacterium *Rhodopseudomonas palustris*. Journal of Bacteriology 198, 867–876 (2016).
4. Kovach, M. E., P. H. Elzer, D. S. Hill, G. T. Robertson, M. A. Farris, R. M. Roop II, and K. M. Peterson. Four new derivatives of the broad host range cloning vector pBBR1MCS, carrying different antibiotic-resistance cassettes. Gene 166, 175-176 (1995).
