# Supplementary material for: Identification of an Exopolysaccharide Biosynthesis Gene in Bradyrhizobium diazoefficiens USDA110
Source: Microorganisms. 2021 Dec 1;9(12):2490. doi: 10.3390/microorganisms9122490 (PMC8707904; doi:10.3390/microorganisms9122490)
Supplement: Supplementary file 1 [file microorganisms-09-02490-s001.zip › Table S3 List of glycosyl transferase homologs _2nd Revision CS241121.xls]

## Sheet: Homologs
Identification of an exopolysaccharide biosynthesis gene in Bradyrhizobium diazoefficiens USDA110 by Chunxia Xu, Huaqin Ruan, Wenjie Cai, Christian Staehelin and Weijun Dai Table S3. List of glycosyltransferase homologs of blr2358 in the Bradyrhizobium genus
	Genome Name	Gene Id	Gene locus	Gene product Name	E-value	Identities %	Gene Length (bp)	Protein domain
2847922070	Bradyrhizobium diazoefficiens USDA 110	637369922	blr2358	Glycosyl transferase	0	100	447	Sugar transferase (pfam13727), CoA binding (pfam02397)
		637372551	blr4974	polysaccharide biosynthesis glycosyltransferase	2e-71	36	495	Sugar transferase (pfam13727), CoA binding (pfam02397)
		637373898	bll6310	putative exopolysaccharide production protein	3e-55	31	515	Sugar transferase (pfam13727)
2888378607	Bradyrhizobium sp. LCT2	2888386105	Ga0439693_01_7705658_7707001	putative colanic acid biosynthesis UDP-glucose lipid carrier transferase	0	100	447	Sugar transferasep(fam02397), CoA binding(pfam13727)
		2888383254	Ga0439693_01_4722686_4724233	Undecaprenyl-phosphate glucose phosphotransferase	3e-55	31	515	Sugar transferase(fam02397), CoA binding(pfam13727)
		2888381754	Ga0439693_01_3241174_3241827	lipopolysaccharide/colanic/teichoic acid biosynthesis glycosyltransferase	9e-31	38	217	Sugar transferase (pfam02397)
2849083465	Bradyrhizobium diazoefficiens XF7	2849086195	Ga0349705_01_2778871_2780214	putative colanic acid biosynthesis UDP-glucose lipid carrier transferase	0	100	447	Sugar transferasep(fam02397), CoA binding(pfam13727)
		2849089052	Ga0349705_01_5740983_5742530	Undecaprenyl-phosphate glucose phosphotransferase	3e-55	31	515	Sugar transferase(fam02397), CoA binding(pfam13727)
		2849090556	Ga0349705_01_7217172_7217831	lipopolysaccharide/colanic/teichoic acid biosynthesis glycosyltransferase	9e-34	40	219	Sugar transferase (pfam02397)
2847914055	Bradyrhizobium sp. ORS3257	2847920236	Ga0337771_01_6228639_6230069	putative colanic acid biosynthesis UDP-glucose lipid carrier transferase	0	70	476	Sugar transferase(fam02397), CoA binding(pfam13727)
		2847920364	Ga0337771_01_6378004_6379446	undecaprenyl-phosphate galactose phosphotransferase/putative colanic acid biosynthesis UDP-glucose lipid carrier transferase	2e-108	41	480	Sugar transferase(fam02397), CoA binding(pfam13727)
		2847916634	Ga0337771_01_2600742_2602208	putative colanic acid biosynthesis UDP-glucose lipid carrier transferase	1e-100	41	488	Sugar transferase (pfam02397)
		2847917776	Ga0337771_01_3744119_3745669	Undecaprenyl-phosphate glucose phosphotransferase	7e-58	31	516	Sugar transferase(fam02397), CoA binding(pfam13727)
		2847920320	Ga0337771_01_6327802_6328494	exopolysaccharide production protein ExoY	2e-34	40	230	Sugar transferase (pfam02397)
2844315083	Bradyrhizobium guangzhouense CCBAU 51670	2844320616	Ga0398820_01_5709624_5711285	Undecaprenyl-phosphate glucose phosphotransferase	0	70	553	Sugar transferase(fam02397), CoA binding(pfam13727)
		2844320664	Ga0398820_01_5753661_5755160	undecaprenyl-phosphate galactose phosphotransferase/putative colanic acid biosynthesis UDP-glucose lipid carrier transferase	7e-102	41	499	Sugar transferase(fam02397), CoA binding(pfam13727)
		2844318317	Ga0398820_01_3297685_3299232	Undecaprenyl-phosphate glucose phosphotransferase	3e-56	31	515	Sugar transferase(fam02397), CoA binding(pfam13727)
2847948219	Bradyrhizobium guangdongense CCBAU 51649	2847954214	Ga0398539_01_6143797_6145221	putative colanic acid biosynthesis UDP-glucose lipid carrier transferase	0	93	474	CoA binding(pfam13727),Sugar transferase(fam02397)
		2847950914	Ga0398539_01_2778854_2780281	putative colanic acid biosynthesis UDP-glucose lipid carrier transferase	0	66	475	CoA binding(pfam13727),Sugar transferase(fam02397)
		2847950812	Ga0398539_01_2657089_2658552	undecaprenyl-phosphate galactose phosphotransferase/putative colanic acid biosynthesis UDP-glucose lipid carrier transferase	2e-102	42	487	Sugar transferase(fam02397), CoA binding(pfam13727)
		2847952584	Ga0398539_01_4447902_4449449	Undecaprenyl-phosphate glucose phosphotransferase	5e-58	32	515	CoA binding(pfam13727),Sugar transferase(fam02397)
2824679649	Bradyrhizobium sp.HAMBI 2116	2824684346	Ga0376854_4699	putative colanic acid biosynthesis UDP-glucose lipid carrier transferase	0	70	476	CoA binding(pfam13727),Sugar transferase(fam02397)
		2824683126	Ga0376854_3479	undecaprenyl-phosphate galactose phosphotransferase/putative colanic acid biosynthesis UDP-glucose lipid carrier transferase	5e-106	40	455	CoA binding(pfam13727),Sugar transferase(fam02397)
		2824680456	Ga0376854_808	putative colanic acid biosynthesis UDP-glucose lipid carrier transferase	2e-91	40	489	Sugar transferase(fam02397)
		2824683721	Ga0376854_4074	Undecaprenyl-phosphate glucose phosphotransferase	6e-57	31	516	Sugar transferase(fam02397), CoA binding(pfam13727)
2847930680	Bradyrhizobium zhanjiangense CCBAU 51778	2847938165	Ga0399254_01_7542855_7544285	Undecaprenyl-phosphate glucose phosphotransferase	0	72	476	CoA binding(pfam13727),Sugar transferase(fam02397)
		2847938193	Ga0399254_01_7592707_7594074	undecaprenyl-phosphate galactose phosphotransferase/putative colanic acid biosynthesis UDP-glucose lipid carrier transferase	2e-110	39	455	Sugar transferase(fam02397), CoA binding(pfam13727)
		2847933738	Ga0399254_01_3117060_3118526	putative colanic acid biosynthesis UDP-glucose lipid carrier transferase	4e-98	39	488	CoA binding(pfam13727),Sugar transferase(fam02397)
		2847935194	Ga0399254_01_4534827_4536377	Undecaprenyl-phosphate glucose phosphotransferase	9e-57	31	516	CoA binding(pfam13727),Sugar transferase(fam02397)
2888419890	Bradyrhizobium sp. 1(2017) 63S1MB	2888426214	Ga0439901_01_6517323_6518753	putative colanic acid biosynthesis UDP-glucose lipid carrier transferase	0	70	476	CoA binding(pfam13727),Sugar transferase(fam02397)
		2888426230	Ga0439901_01_6538900_6540264	undecaprenyl-phosphate galactose phosphotransferase/putative colanic acid biosynthesis UDP-glucose lipid carrier transferase	9e-105	40	454	Sugar transferase(fam02397), CoA binding(pfam13727)
		2888422359	Ga0439901_01_2549419_2550888	putative colanic acid biosynthesis UDP-glucose lipid carrier transferase	4e-86	39	489	Sugar transferase(fam02397), CoA binding(pfam13727)
		2888423636	Ga0439901_01_3840336_3841886	Undecaprenyl-phosphate glucose phosphotransferase	6e-57	31	516	Sugar transferase(fam02397), CoA binding(pfam13727)
2511231207	Bradyrhizobium japonicum USDA 6	2512002994	BJ6T_74800	putative colanic acid biosysnthesis UDP-glucose lipid carrier transferase	0	96	474	Sugar transferase(fam02397), CoA binding(pfam13727)
		2512000227	BJ6T_47130	Undecaprenyl-phosphate glucose phosphotransferase	1e-54	31	536	Sugar transferase(fam02397), CoA binding(pfam13727)
		2512001854	BJ6T_63400	Sugar transferase involved in LPS biosynthesis (colanic, teichoic acid)	5e-22	30	247	Sugar transferase(fam02397)
2576861420	Bradyrhizobium japonicum SEMIA 5079	2578321098	BJS_07307	putative colanic acid biosysnthesis UDP-glucose lipid carrier transferase	0	96	447	Sugar transferase(fam02397), CoA binding(pfam13727)
		2578322789	BJS_03509	putative colanic acid biosysnthesis UDP-glucose lipid carrier transferase	8e-101	42	507	Sugar transferase(fam02397), CoA binding(pfam13727)
		2578322192	BJS_02907	Undecaprenyl-phosphate glucose phosphotransferase	6e-55	31	516	Sugar transferase(fam02397), CoA binding(pfam13727)
		2578323808	BJS_06778	Sugar transferase involved in LPS biosynthesis (colanic, teichoic acid)	7e-22	30	247	Sugar transferase(fam02397)
2849076700	Bradyrhizobium symbiodeficiens 85S1MB	2849077654	Ga0398464_01_967428_968852	Undecaprenyl-phosphate glucose phosphotransferase	0	95	474	CoA binding(pfam13727),Sugar transferase(fam02397)
		2849077713	Ga0398464_01_1059557_1061017	undecaprenyl-phosphate galactose phosphotransferase/putative colanic acid biosynthesis UDP-glucose lipid carrier transferase	1e-92	38	486	CoA binding(pfam13727),Sugar transferase(fam02397)
		2849080066	Ga0398464_01_3546248_3547795	Undecaprenyl-phosphate glucose phosphotransferase	1e-56	30	515	Sugar transferase(fam02397), CoA binding(pfam13727)
2847939898	Bradyrhizobium ottawaense OO99	2847940065	Ga0399835_01_182309_183649	putative colanic acid biosynthesis UDP-glucose lipid carrier transferase	0	70	446	Sugar transferase(fam02397), CoA binding(pfam13727)
		2847940125	Ga0399835_01_260941_262308	undecaprenyl-phosphate galactose phosphotransferase/putative colanic acid biosynthesis UDP-glucose lipid carrier transferase	1e-100	39	455	Sugar transferase(fam02397), CoA binding(pfam13727)
		2847947223	Ga0399835_01_7524126_7525766	putative colanic acid biosynthesis UDP-glucose lipid carrier transferase	3e-90	41	546	Sugar transferase(fam02397)
		2847945793	Ga0399835_01_6074403_6075950	Undecaprenyl-phosphate glucose phosphotransferase	8e-57	30	515	Sugar transferase(fam02397), CoA binding(pfam13727)
2888404755	Bradyrhizobium sp. SG09	2888408421	Ga0439683_01_3829417_3830757	putative colanic acid biosynthesis UDP-glucose lipid carrier transferase	0	70	446	CoA binding(pfam13727),Sugar transferase(fam02397)
		2888411970	Ga0439683_01_7487500_7488867	undecaprenyl-phosphate galactose phosphotransferase/putative colanic acid biosynthesis UDP-glucose lipid carrier transferase	2e-109	41	455	CoA binding(pfam13727),Sugar transferase(fam02397)
		2888409603	Ga0439683_01_5113874_5115514	putative colanic acid biosynthesis UDP-glucose lipid carrier transferase	3e-90	41	546	Sugar transferase(fam02397)
		2888410972	Ga0439683_01_6507817_6509364	Undecaprenyl-phosphate glucose phosphotransferase	9e-57	30	515	CoA binding(pfam13727),Sugar transferase(fam02397)
2888412883	Bradyrhizobium sp. TM102	2888419026	Ga0439699_01_6448095_6449435	putative colanic acid biosynthesis UDP-glucose lipid carrier transferase	0	70	446	CoA binding(pfam13727),Sugar transferase(fam02397)
		2888419082	Ga0439699_01_6516957_6518456	undecaprenyl-phosphate galactose phosphotransferase/putative colanic acid biosynthesis UDP-glucose lipid carrier transferase	7e-108	42	499	Sugar transferase(fam02397), CoA binding(pfam13727)
		2888417888	Ga0439699_01_5202968_5204608	putative colanic acid biosynthesis UDP-glucose lipid carrier transferase	9e-90	41	546	Sugar transferase(fam02397)
		2888416550	Ga0439699_01_3826043_3827590	Undecaprenyl-phosphate glucose phosphotransferase	8e-57	30	515	CoA binding(pfam13727),Sugar transferase(fam02397)
2844521893	Bradyrhizobium amphicarpaeae 39S1MB	2844523180	Ga0399844_01_1335389_1336729	putative colanic acid biosynthesis UDP-glucose lipid carrier transferase	0	70	446	Sugar transferase(fam02397), CoA binding(pfam13727)
		2844523151	Ga0399844_01_1285863_1287359	undecaprenyl-phosphate galactose phosphotransferase/putative colanic acid biosynthesis UDP-glucose lipid carrier transferase	7e-106	40	498	CoA binding(pfam13727),Sugar transferase(fam02397)
		2844525397	Ga0399844_01_3728364_3729911	Undecaprenyl-phosphate glucose phosphotransferase	8e-57	30	515	CoA binding(pfam13727),Sugar transferase(fam02397)
2513237178	Bradyrhizobium sp. S23321	2514092599	S23_56680	putative colanic acid biosysnthesis UDP-glucose lipid carrier transferase	0	95	445	Sugar transferase(fam02397), CoA binding(pfam13727)
		2514093210	S23_62800	putative colanic acid biosysnthesis UDP-glucose lipid carrier transferase	4e-91	40	432	Sugar transferase(fam02397), CoA binding(pfam13727)
		2514090143	S23_32110	Undecaprenyl-phosphate glucose phosphotransferase	8e-56	37	520	CoA binding(pfam13727),Sugar transferase(fam02397)
2888388044	Bradyrhizobium cosmicum 58S1	2888392171	Ga0439701_01_4275844_4277268	putative colanic acid biosynthesis UDP-glucose lipid carrier transferase	0	95	474	Sugar transferase(fam02397), CoA binding(pfam13727)
		2888391556	Ga0439701_01_3633808_3635268	undecaprenyl-phosphate galactose phosphotransferase/putative colanic acid biosynthesis UDP-glucose lipid carrier transferase	1e-93	40	486	Sugar transferase(fam02397), CoA binding(pfam13727)
		2888394656	Ga0439701_01_6849448_6850995	Undecaprenyl-phosphate glucose phosphotransferase	1e-55	29	515	Sugar transferase(fam02397), CoA binding(pfam13727)
2847900092	Bradyrhizobium sp. KBS0725	2847903282	Ga0402185_01_3412316_3413866	Undecaprenyl-phosphate glucose phosphotransferase	2e-57	31	516	Sugar transferase(fam02397), CoA binding(pfam13727)
		2847905846	Ga0402185_01_6023586_6024284	lipopolysaccharide/colanic/teichoic acid biosynthesis glycosyltransferase	5e-28	36	232	Sugar transferase(fam02397), CoA binding(pfam13727)
2847907072	Bradyrhizobium sp. KBS0727	2847910264	Ga0402178_01_3412330_3413880	Undecaprenyl-phosphate glucose phosphotransferase	2e-57	31	516	CoA binding(pfam13727),Sugar transferase(fam02397)
		2847912829	Ga0402178_01_6023624_6024322	lipopolysaccharide/colanic/teichoic acid biosynthesis glycosyltransferase	5e-28	36	232	Sugar transferase(fam02397), CoA binding(pfam13727)
2889023381	Bradyrhizobium sp. 6(2017) 1S3	2889032961	Ga0439568_01_9662290_9663732	undecaprenyl-phosphate galactose phosphotransferase/putative colanic acid biosynthesis UDP-glucose lipid carrier transferase	2e-91	42	480	Sugar transferase(fam02397), CoA binding(pfam13727)
		2889025031	Ga0439568_01_1638883_1640424	Undecaprenyl-phosphate glucose phosphotransferase	2e-56	31	513	CoA binding(pfam13727),Sugar transferase(fam02397)
2888395147	Bradyrhizobium elkanii USDA 61	2888402216	Ga0439853_01_7035155_7036573	undecaprenyl-phosphate galactose phosphotransferase/putative colanic acid biosynthesis UDP-glucose lipid carrier transferase	4e-93	39	472	Sugar transferase(fam02397), CoA binding(pfam13727)
		2888395553	Ga0439853_01_420651_422150	Undecaprenyl-phosphate glucose phosphotransferase	3e-76	38	499	Sugar transferase(fam02397), CoA binding(pfam13727)
		2888400538	Ga0439853_01_5328574_5330118	Undecaprenyl-phosphate glucose phosphotransferase	2e-57	31	514	CoA binding(pfam13727),Sugar transferase(fam02397)
2889033259	Bradyrhizobium sp. CCBAU 051011	2889042412	Ga0443171_01_9068124_9069587	undecaprenyl-phosphate galactose phosphotransferase/putative colanic acid biosynthesis UDP-glucose lipid carrier transferase	4e-105	41	487	Sugar transferase(fam02397), CoA binding(pfam13727)
		2889034656	Ga0443171_01_1380138_1381619	putative colanic acid biosynthesis UDP-glucose lipid carrier transferase	7e-75	38	493	Sugar transferase(fam02397)
		2889033372	Ga0443171_01_87309_88724	Undecaprenyl-phosphate glucose phosphotransferase	1e-60	43	471	Sugar transferase(fam02397)
		2889040653	Ga0443171_01_7365018_7366556	Undecaprenyl-phosphate glucose phosphotransferase	3e-56	30	512	CoA binding(pfam13727),Sugar transferase(fam02397)
		2889034209	Ga0443171_01_919030_919794	exopolysaccharide biosynthesis polyprenyl glycosylphosphotransferase	3e-55	50	254	Sugar transferase(fam02397)
		2889040912	Ga0443171_01_7622906_7623640	exopolysaccharide production protein ExoY	3e-33	43	244	Sugar transferase(fam02397)
